# Supplementary material for: Unprecedented Mechanochemical Synthesis and Heterogenization of a C-Scorpionate Au(III) Catalyst for Microwave-Assisted Biomass Valorization
Source: MDPI journal article supplement (doi:10.3390/nano12030362), 2022-01-23
Supplement: s1 [file s1]

# Supporting Information

for

## Unprecedented Mechanochemical Synthesis and Heterogenization of a C-Scorpionate Au(III) Catalyst for Microwave-Assisted Biomass Valorization

Inês A. S. Matias <sup>1</sup>, Pablo G. Selfa <sup>1</sup>, Ana M. Ferraria <sup>2,3</sup>, Ana M. Botelho do Rego <sup>2,3</sup>, Maximilian N. Kopylovich <sup>1</sup>, Ana P. C. Ribeiro <sup>1,\*</sup> and Luísa M. D. R. S. Martins <sup>1,\*</sup>

- <sup>1</sup> Centro de Química Estrutural, Institute of Molecular Sciences, and Departamento de Engenharia Química, Instituto Superior Técnico, Universidade de Lisboa, 1049-001 Lisboa, Portugal; ines.matias@tecnico.ulisboa.pt (I.A.S.M.); pablogselfa@tecnico.ulisboa.pt (P.G.S.); maximilian.kopylovich@tecnico.ulisboa.pt (M.N.K.)
- <sup>2</sup> iBB—Institute for Bioengineering and Biosciences and Departamento de Engenharia Química, Instituto Superior Técnico, Universidade de Lisboa, Av. Rovisco Pais, 1049-001 Lisboa, Portugal; ana.ferraria@tecnico.ulisboa.pt (A.M.F.); amrego@tecnico.ulisboa.pt (A.M.B.d.R.)
- <sup>3</sup> Associate Laboratory i4HB, Institute for Health and Bioeconomy at Instituto Superior Técnico, Universidade de Lisboa, Av. Rovisco Pais, 1049-001 Lisboa, Portugal
- \* Correspondence: apribeiro@tecnico.ulisboa.pt (A.P.C.R.); luisammartins@tecnico.ulisboa.pt (L.M.D.R.S.M.); Tel.: +351-218-419-389 (L.M.D.R.S.M.)

Table S1 shows the XPS atomic concentrations (%) of the detected elements and relevant atomic ratios for the samples [AuCl<sub>2</sub>(Tpm)]Cl<sub>2</sub>BM and AuClTpm<sub>2</sub>PM.

**Table S1.** – Experimental XPS atomic concentrations (%) and atomic ratios for [AuCl<sub>2</sub>(Tpm)]Cl<sub>2</sub>BM and AuClTpm<sub>2</sub>PM compared to the predicted ones.

|       | [AuCl <sub>2</sub> (Tpm)]Cl | AuClTpm <sub>2</sub> PM | Predicted |
|-------|-----------------------------|-------------------------|-----------|
|       | Atomic Concentrations (%)   |                         |           |
| Au    | 5.0                         | 0.5                     | 5         |
| Cl    | 11.9                        | 8.0                     | 15        |
| C     | 59.6                        | 63.6                    | 50        |
| O     | 7.0                         | 2.1                     | –         |
| N     | 16.7                        | 25.9                    | 30        |
|       | Atomic ratios               |                         |           |
| Cl/Au | 2.4                         | 17.7                    | 3         |
| N/Au  | 3.4                         | 57.7                    | 6         |

Figure S1 shows the EDS spectra (YY axis: intensity) of the different materials obtained by using the planetary Emax High Energy Ball Mill and the Planetary Ball Mill PM 100.

(a)

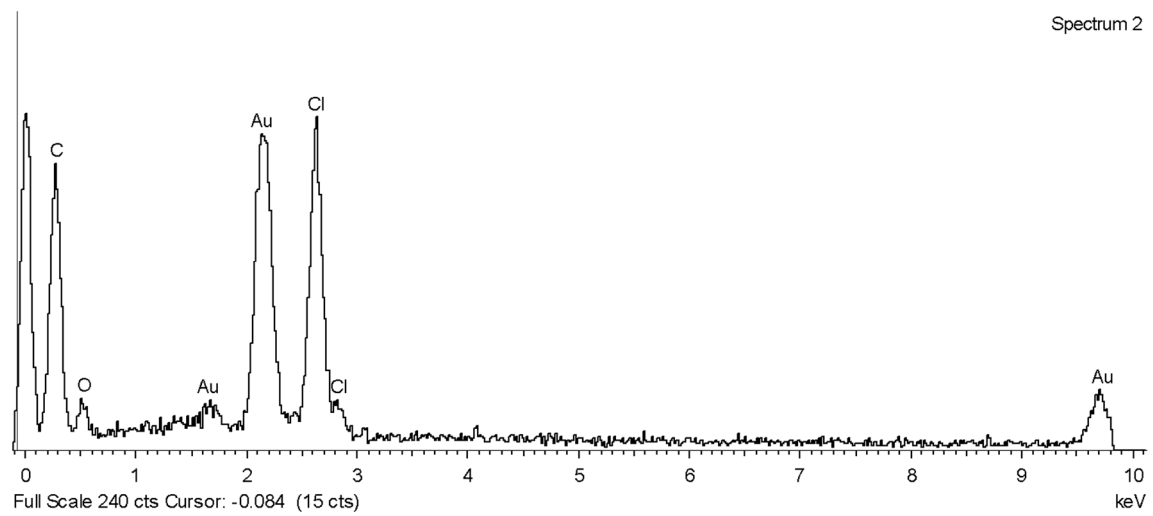

(b)

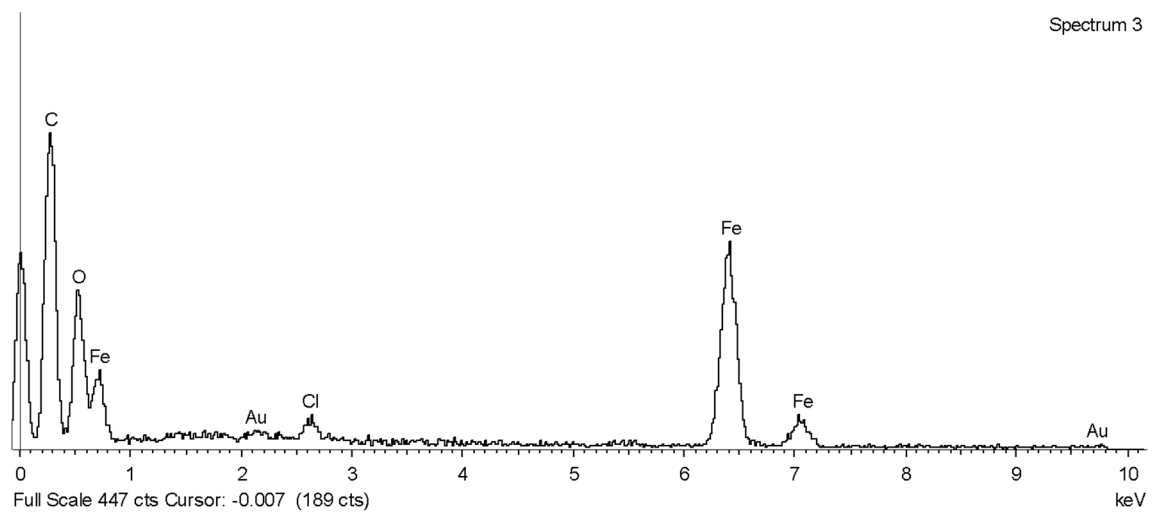

(c)

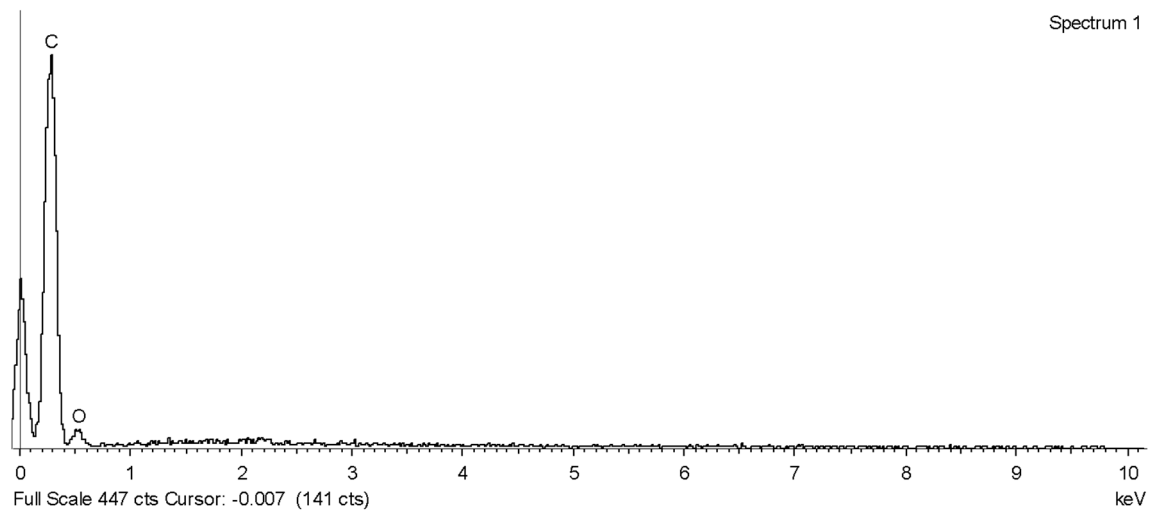

(d)

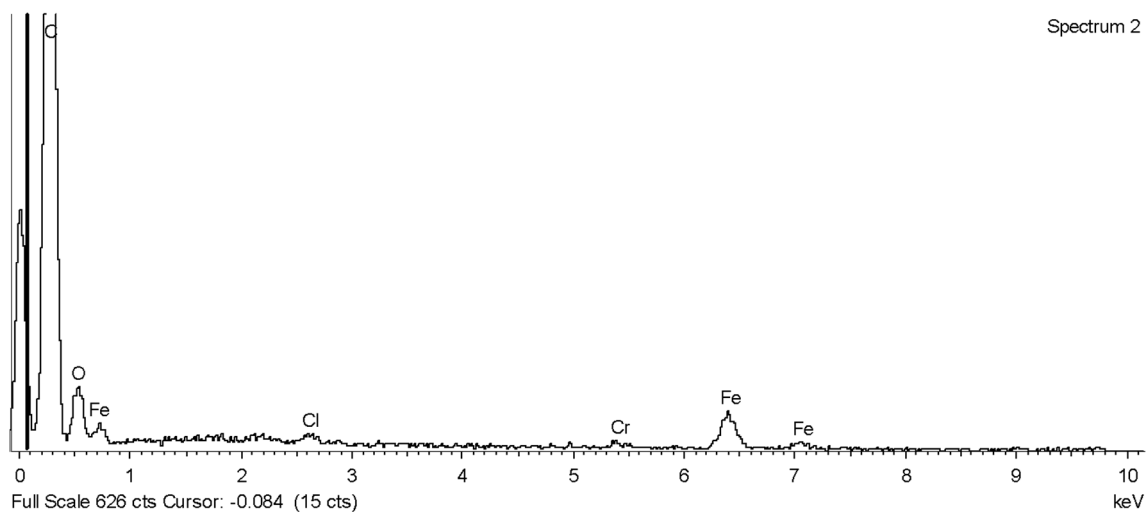

(c)

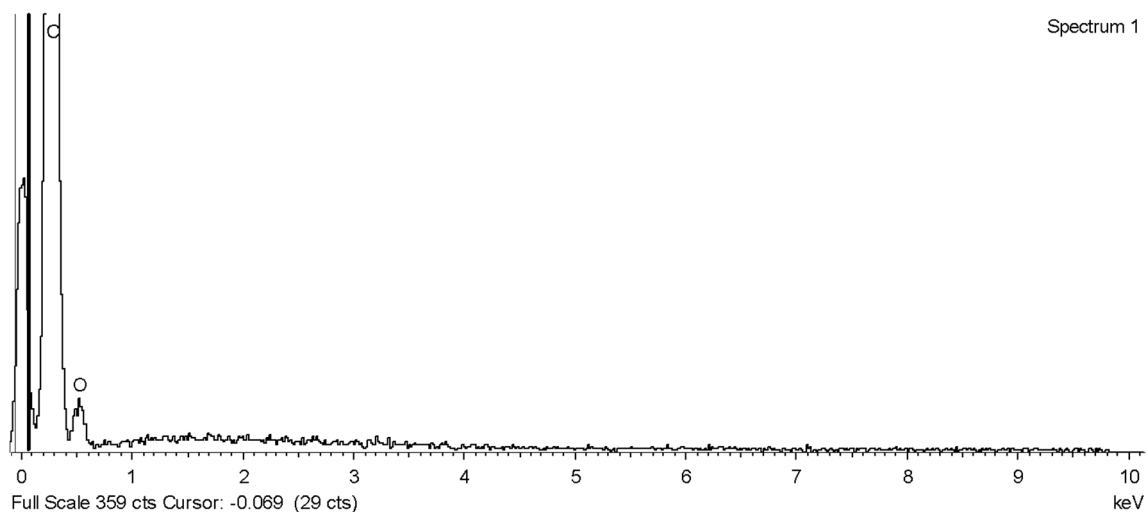

**Figure S1.** – EDS spectra (YY axis: intensity) of (a) hydrotris(1*H*-pyrazol-1-yl)methane dichloro-gold(III) complex  $[\text{AuCl}_2(\kappa^2\text{-Tpm})]\text{Cl}$  (Tpm = HCpz<sub>3</sub>; pz = pyrazol-1-yl) synthesized by mechanochemistry using the planetary Emax High Energy Ball Mill; (b) the mechanochemical product from reaction of an equimolar amount of  $\text{HAuCl}_4 \cdot 3\text{H}_2\text{O}$  and Tpm, using the planetary Ball Mill PM 100; pristine graphene sheets before (c) and (d) after mechanochemical treatment at Planetary Ball Mill PM 100 and (e) at Emax High Energy Ball Mill.

Figure S2 presents the ATR-FTIR spectrum of the graphene sheets. It does not show the presence of oxygen-containing groups in the initial sample. It displays the characteristic C-C and C=C stretching modes at 2158, 2027 and 1975  $\text{cm}^{-1}$ .

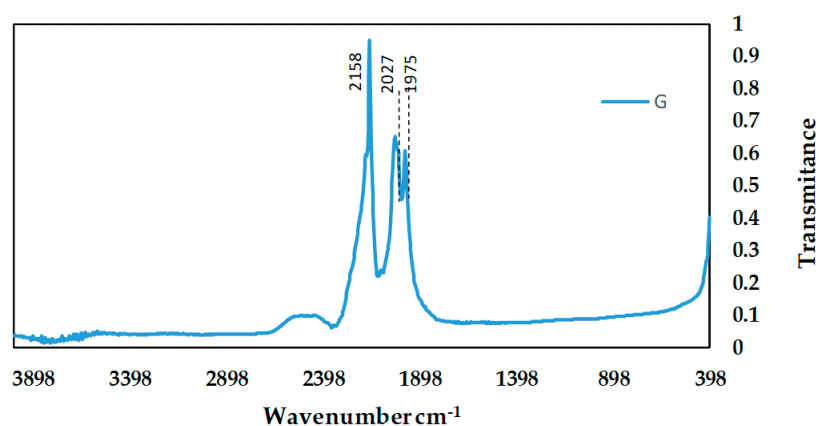

**Figure S2** - ATR-FTIR spectrum of the graphene used for the immobilization of  $[\text{AuCl}_2(\text{Tpm})]\text{Cl\_BM}$ .

Figure S3 shows the powder X-ray diffraction patterns revealing that graphene presents two peaks at  $2\theta = 24.6^\circ$  and  $44.6^\circ$ , which can be attributed to the amorphous graphitic carbon (002) and (100), respectively.

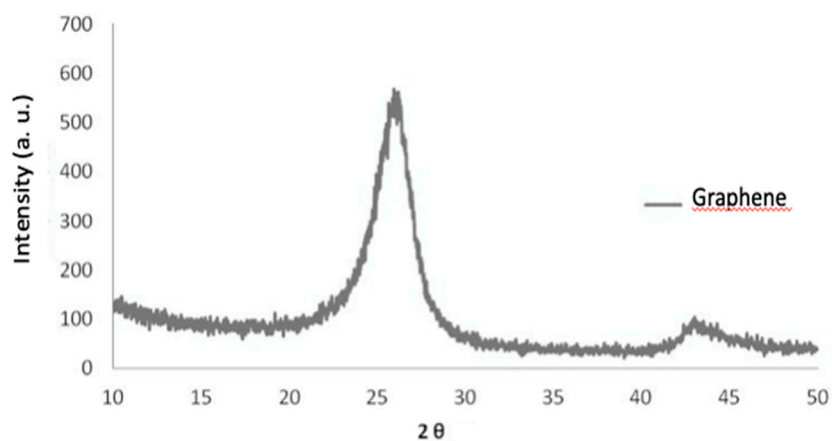

**Figure S3** – PXRD of the graphene used for the immobilization of  $[\text{AuCl}_2(\text{Tpm})]\text{Cl\_BM}$ .
